# Supplementary material for: Controlled preparation of interconnected 3D hierarchical porous carbons from bacterial cellulose-based composite monoliths for supercapacitors
Source: Royal Society of Chemistry journal article supplement (doi:10.1039/d0nr03591b), 2020-01-01
Supplement: d0nr03591b1.pdf [file d0nr03591b1.pdf]

## Supporting Information

### Controlled Preparation of Interconnected 3D Hierarchical Porous Carbons from Bacterial Cellulose-based Composite Monoliths for Supercapacitors

Qihong Bai,<sup>a</sup> Yehua Shen,<sup>a</sup> Taka-Aki Asoh,<sup>b</sup> Cong Li,<sup>a</sup> Yong Dan,<sup>\*c</sup> and Hiroshi Uyama<sup>\*a,b</sup>

<sup>a</sup>Key Laboratory of Synthetic and Natural Functional Molecule of Ministry of Education, College of Chemistry and Materials Science, National Demonstration Center for Experimental Chemistry Education, Northwest University, Xi'an, 710127, China

<sup>b</sup>School of Chemical Engineering, Northwest University, Xi'an, 710127, China

<sup>c</sup>Department of Applied Chemistry, Graduate School of Engineering, Osaka University, Suita 565-0871, Japan

\*Corresponding author: E-mail: danyong11@163.com, uyama@chem.eng.osaka-u.ac.jp<sup>1</sup>

#### Content:

**Fig. S1** Fabrication process of EVOH/BC composite monolith and porous carbon from EVOH/BC<sub>(65%)</sub>.

**Fig. S2** TEM images (a,d) and corresponding elemental mapping images of C (b, e) and O (c, f) of EVOH/BC<sub>(50%)</sub>-800-2.5 (a-c) and EVOH/BC<sub>(40%)</sub>-800-2.5 (d-f).

**Fig. S3** SEM images of the of the EVOH/BC<sub>(65%)</sub>-800-1(a), EVOH/BC<sub>(65%)</sub>-800-2(b), EVOH/BC<sub>(65%)</sub>-800-2.5(c), EVOH/BC<sub>(65%)</sub>-800-3(d), EVOH/BC<sub>(65%)</sub>-700-2.5(e), and EVOH/BC<sub>(65%)</sub>-900-2.5(f).

**Fig. S4** TG and DTG curves of EVOH/BC<sub>(65%)</sub> monolith under N<sub>2</sub> atmosphere.

---

\*Corresponding author.

E-mail: danyong11@163.com, Tel: +029-88302632  
uyama@chem.eng.osaka-u.ac.jp, Tel: +81-6-6879-7364

<sup>1</sup> These authors contributed equally to this work.

**Fig. S5** N<sub>2</sub> adsorption/desorption isotherms of EVOH/BC<sub>(65%)</sub>-800-2.5 (a), EVOH/BC<sub>(50%)</sub>-800-2.5 (b) and EVOH/BC<sub>(40%)</sub>-800-2.5 (c).

**Fig. S6** CV curves at a scan rate of 50 mV s<sup>-1</sup> (a), GCD curves at a current density of 0.5 A g<sup>-1</sup> (b) of BC-800-2.5, EVOH<sub>(65%)</sub>-800-2.5, and EVOH/BC<sub>(65%)</sub>-800-2.5.

**Fig. S7** CV curves at a scan rate of 50 mV s<sup>-1</sup> (a), GCD curves at a current density of 0.5 A g<sup>-1</sup> (b) of EVOH/BC<sub>(65%)</sub>-800-1, EVOH/BC<sub>(65%)</sub>-800-2, EVOH/BC<sub>(65%)</sub>-800-2.5 and EVOH/BC<sub>(65%)</sub>-800-3.

**Fig. S8** SEM images of the EVOH/BC<sub>(65%)</sub>-800-2.5 electrode before and after 10,000 charging and discharging cycles.

**Fig. S9** Specific capacitance and capacitance retention at different current densities of EVOH/BC<sub>(65%)</sub>-800-2.5// EVOH/BC<sub>(65%)</sub>-800-2.5 symmetric supercapacitor (two-electrode).

**Table S1** XPS and elemental analysis of EVOH/BC<sub>(65%)</sub>-700-2.5, EVOH/BC<sub>(65%)</sub>-800-2.5, and EVOH/BC<sub>(65%)</sub>-900-2.5.

**Table S2** The comparison of electrochemical performance between EVOH/BC<sub>(65%)</sub>-800-2.5 and the biomass-carbon electrodes reported in the literatures.

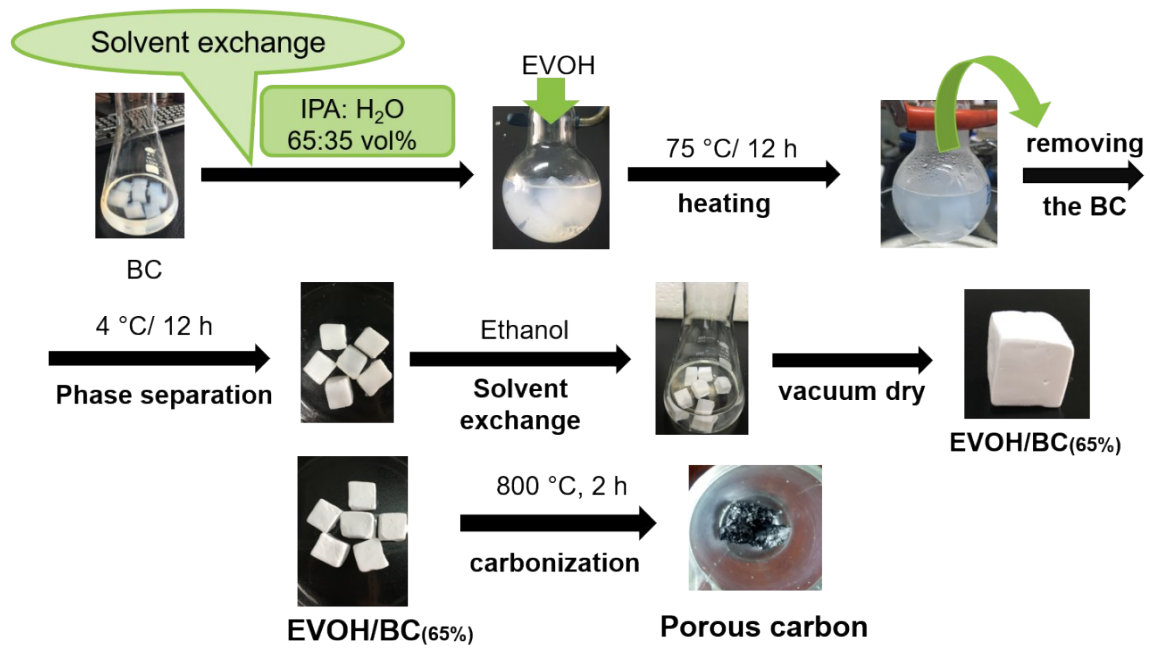

**Fig. S1** Fabrication process of EVOH/BC composite monolith and porous carbon from EVOH/BC(65%).

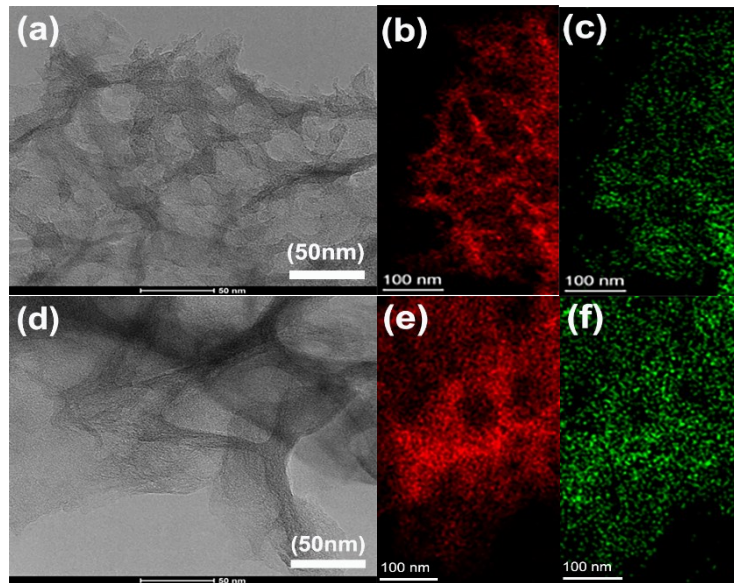

**Fig. S2** TEM images (a, d) and corresponding elemental mapping images of C (b, e) and O (c, f) of EVOH/BC<sub>(50%)</sub>-800-2.5 (a-c) and EVOH/BC<sub>(40%)</sub>-800-2.5(d-f).

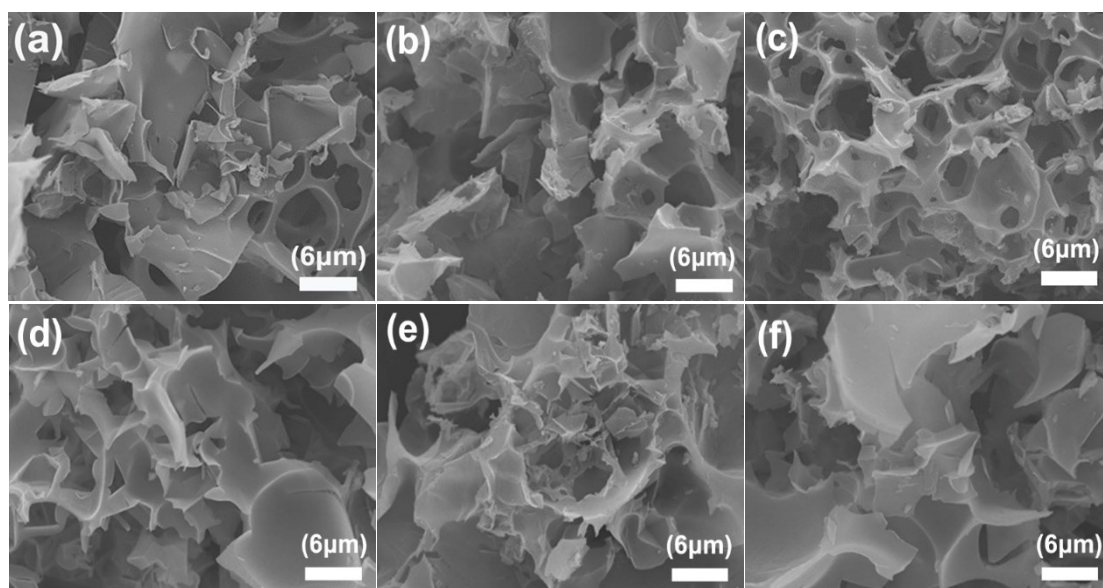

**Fig. S3** SEM images of the of the EVOH/BC<sub>(65%)</sub>-800-1(a), EVOH/BC<sub>(65%)</sub>-800-2(b), EVOH/BC<sub>(65%)</sub>-800-2.5(c), EVOH/BC<sub>(65%)</sub>-800-3(d), EVOH/BC<sub>(65%)</sub>-700-2.5(e), and EVOH/BC<sub>(65%)</sub>-900-2.5(f).

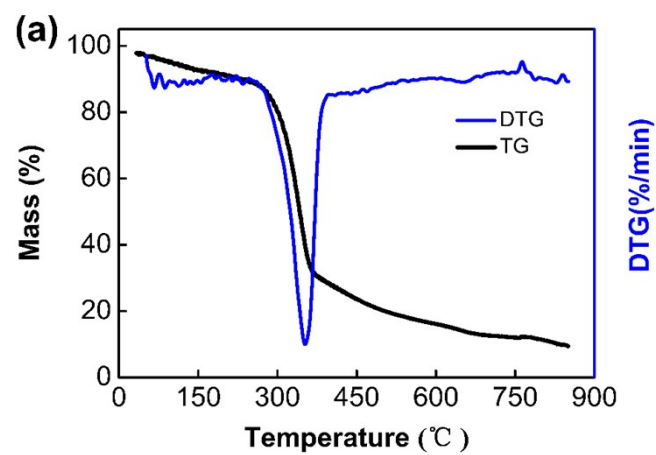

**Fig. S4** TG and DTG curves of EVOH/BC(65%) monolith under N<sub>2</sub> atmosphere.

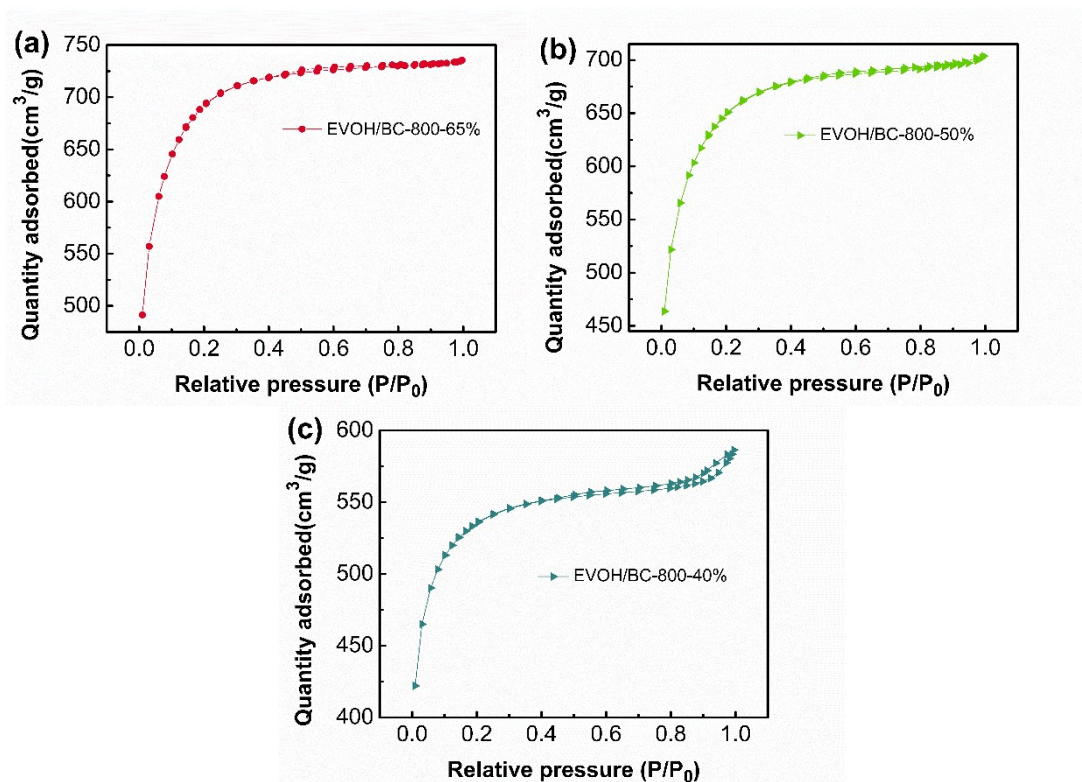

**Fig. S5** N<sub>2</sub> adsorption/desorption isotherms of EVOH/BC(65%)-800-2.5 (a), EVOH/BC(50%)-800-2.5 (b) and EVOH/BC(40%)-800-2.5 (c).

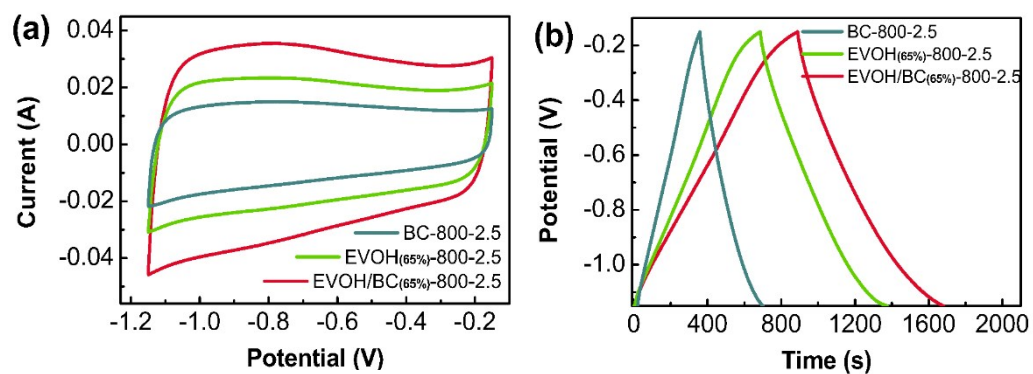

**Fig. S6** CV curves at  $50 \text{ mV s}^{-1}$  (a), GCD curves at  $0.5 \text{ A g}^{-1}$  (b) of BC-800-2.5, EVOH(65%)-800-2.5, and EVOH/BC(65%)-800-2.5.



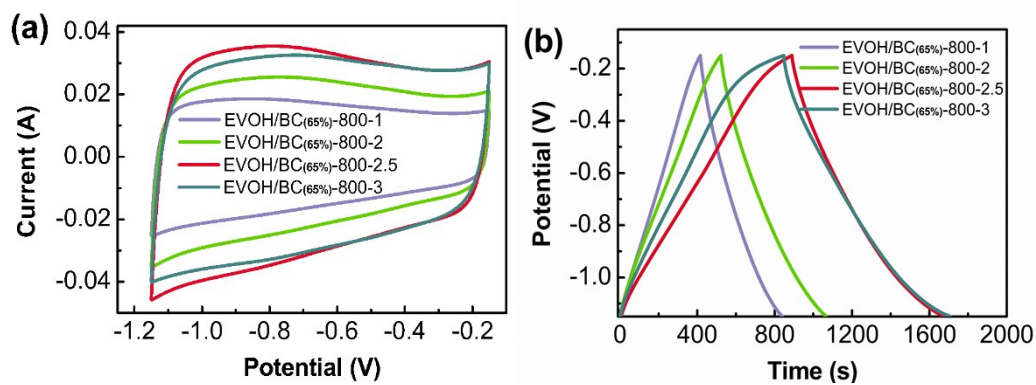

**Fig. S7** CV curves at a scan rate of  $50 \text{ mV s}^{-1}$  (a) and GCD curves at a current density of  $0.5 \text{ A g}^{-1}$  (b) of EVOH/BC<sub>(65%)</sub>-800-1, EVOH/BC<sub>(65%)</sub>-800-2, EVOH/BC<sub>(65%)</sub>-800-2.5 and EVOH/BC<sub>(65%)</sub>-800-3.

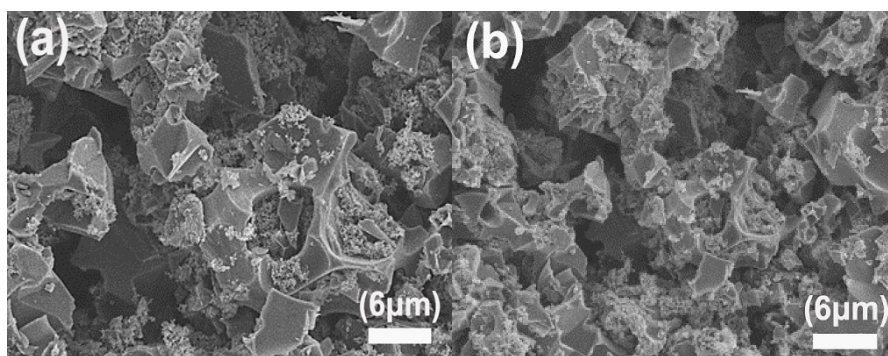

**Fig. S8** SEM images of EVOH/BC<sub>(65%)</sub>-800-2.5 electrode before (a) and after (B) 10,000 charging and discharging cycles.

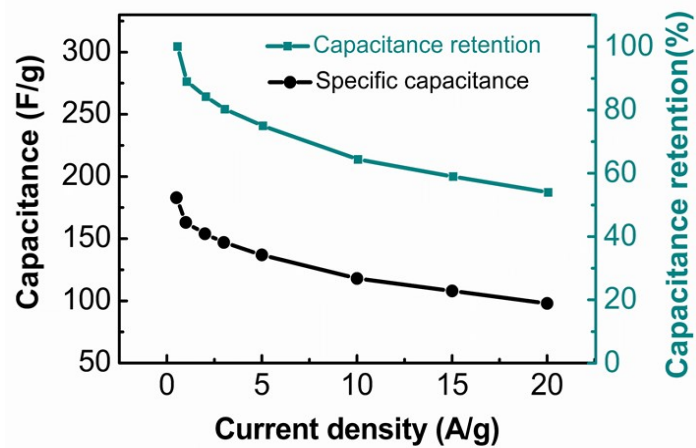

**Fig. S9** Specific capacitance and capacitance retention at different current densities of EVOH/BC<sub>(65%)</sub>-800-2.5//EVOH/BC<sub>(65%)</sub>-800-2.5 symmetric supercapacitor (two-electrode system).

**Table S1** XPS and elemental analysis of EVOH/BC<sub>(65%)</sub>-700-2.5, EVOH/BC<sub>(65%)</sub>-800-2.5, and EVOH/BC<sub>(65%)</sub>-900-2.5.

| Sample                            | at.% by XPS |       | elemental analysis (wt.%) |       |
|-----------------------------------|-------------|-------|---------------------------|-------|
|                                   | C           | O     | C                         | O     |
| EVOH/BC <sub>(65%)</sub> -700-2.5 | 86.78       | 13.22 | 87.23                     | 12.77 |
| EVOH/BC <sub>(65%)</sub> -800-2.5 | 90.01       | 9.99  | 90.93                     | 9.07  |
| EVOH/BC <sub>(65%)</sub> -900-2.5 | 91.67       | 8.33  | 92.92                     | 7.08  |

**Table S2** The comparison of electrochemical performance between EVOH/BC-800-2.5 and the biomass-carbon electrodes reported in the literatures.

| Samples                     | Electrolyte                          | Current density (A g <sup>-1</sup> ) | Cs (F g <sup>-1</sup> ) | Current Density (A g <sup>-1</sup> ) | Capacitance retention             | Ref.            |
|-----------------------------|--------------------------------------|--------------------------------------|-------------------------|--------------------------------------|-----------------------------------|-----------------|
| Algae Microspheres          | 2 M KOH                              | 1.0                                  | 353                     | 20                                   | 92% after 10, 000 cycles          | 9               |
| Medulla tetrapanacis        | 6 M KOH                              | 1.0                                  | 251                     | 1                                    | 95.2% after 10, 000 cycles        | 18              |
| Peach gum                   | 6 M KOH                              | 0.5                                  | 369                     | 20                                   | 95.1% after 10,000 cycles         | 46              |
| Water chestnut              | 6 M KOH                              | 0.5                                  | 346                     | 1                                    | 97.6% after 5, 000 cycles         | 47              |
| bagasse                     | 6 M KOH                              | 0.5                                  | 320                     | 10                                   | 92.85%after 15, 000 cycles        | 51              |
| soybean                     | 6 M KOH                              | 0.5                                  | 243.2                   | 1                                    | 96.5% after 5, 000 cycles         | 53              |
| chitosan                    | 6 M KOH                              | 0.5                                  | 250.5                   | 10                                   | 107% after 5,000 cycles           | 55              |
| Pine Needle                 | 0.5 M H <sub>2</sub> SO <sub>4</sub> | 0.5                                  | 236                     | 2                                    | 110.7% after 5000 cycles          | 56              |
| Perilla frutescens leaves   | 1 M Na <sub>2</sub> SO <sub>4</sub>  | 0.5                                  | 270                     | 2                                    | 96.1% after 10, 000 cycles        | 57              |
| jujube pit                  | 6 M KOH                              | 0.5                                  | 398                     | 5                                    | 97% after 10,000 cycles           | 58              |
| <b>EVOH/BC(65%)-800-2.5</b> | <b>6M KOH</b>                        | <b>0.5</b>                           | <b>420</b>              | <b>5</b>                             | <b>99% after 5, 000 cycles</b>    | <b>Our work</b> |
| <b>EVOH/BC(65%)-800-2.5</b> | <b>6M KOH</b>                        | <b>1</b>                             | <b>405</b>              | <b>5</b>                             | <b>96.1% after 10, 000 cycles</b> | <b>Our work</b> |
